# Supplementary material
Source: PubMed Central journal article supplement (PMC4179488)
Supplement: supp_jcs.128009_JCS128009.pdf [file supp_jcs.128009_JCS128009.pdf]

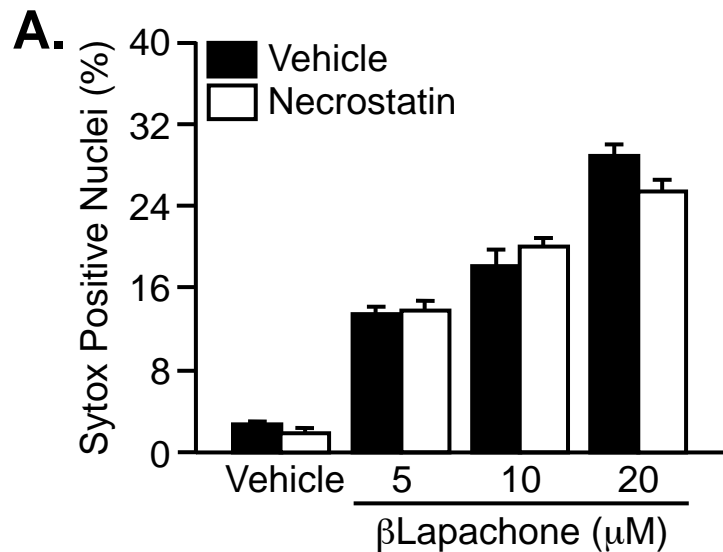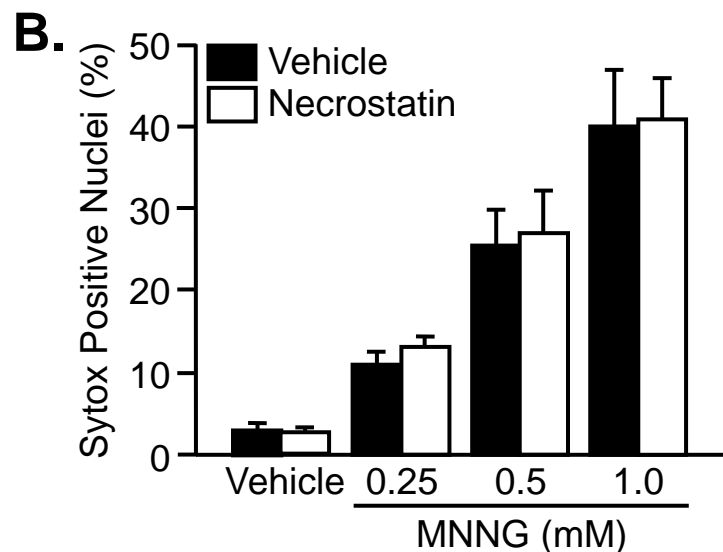

**SUPPLEMENTARY FIGURE 1.  $\beta$ Lapachone and MNNG induced necrosis is insensitive to necrostatin-1.** **A**, Necrosis, as measured by Sytox Green staining, in MEFs treated with increasing concentrations of  $\beta$ lapachone for 4 hrs, with or without the RIP1 inhibitor necrostatin-1 (100 $\mu$ M). **B**, Necrosis, as measured by Sytox Green staining, in MEFs treated with increasing concentrations of MNNG for 4 hrs, with or without necrostatin-1. Results shown are representative of 3-4 independent experiments performed in duplicate. Error bars indicate s.e.m.

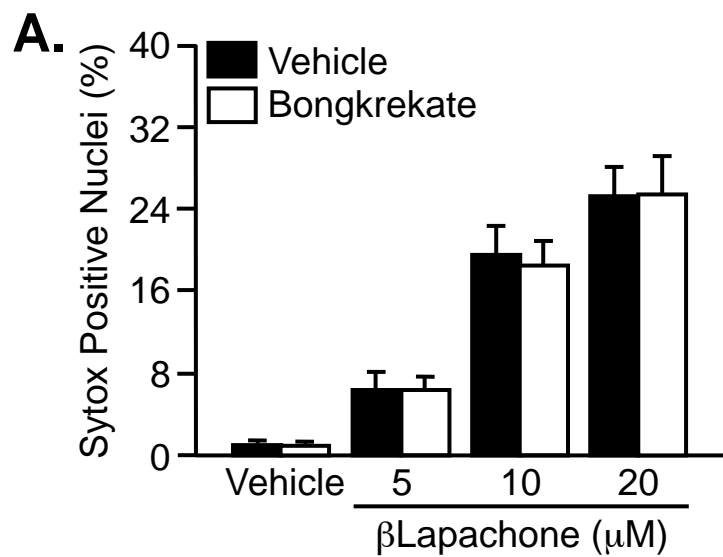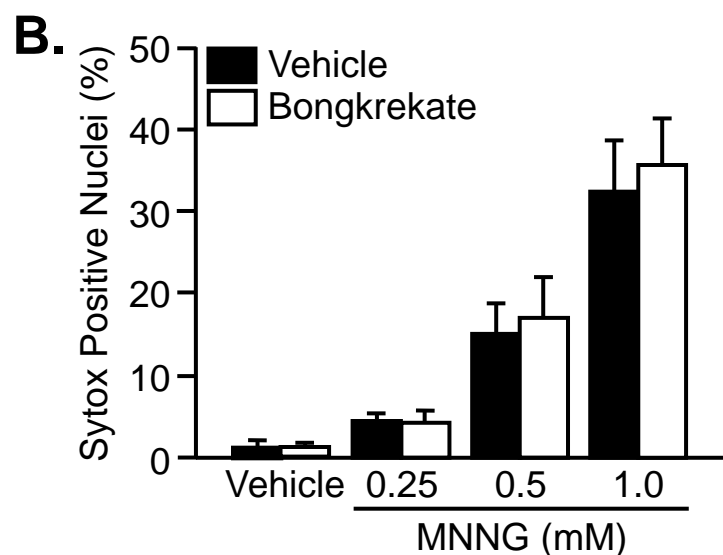

**SUPPLEMENTARY FIGURE 2.  $\beta$ Lapachone and MNNG induced necrosis is insensitive to bongkreikic acid.** **A**, Necrosis, as measured by Sytox Green staining, in MEFs treated with increasing concentrations of  $\beta$ lapachone for 4 hrs, with or without the ANT inhibitor bongkreikic acid (10 $\mu$ M). **B**, Necrosis, as measured by Sytox Green staining, in MEFs treated with increasing concentrations of MNNG for 4 hrs, with or without bongkreikic acid. Results shown are representative of 3-4 independent experiments performed in duplicate. Error bars indicate s.e.m.
